# Supplementary material for: Isolation and identification of marine strains of Stenotrophomona maltophilia with high chitinolytic activity
Source: PeerJ. 2019 Jan 3;7:e6102. doi: 10.7717/peerj.6102 (PMC6321750; doi:10.7717/peerj.6102)
Supplement: Supplemental Information 1 — Raw data of chitinolytic activity measured. [file peerj-07-6102-s001.xlsx]

## Sheet: Hoja1
			SPECIFIC ACTIVITY
		STRAIN/REPETITION	R1	R2	R3	AVERAGE
		B1	4200.18	4030.7	3902.62	4044.5
		B2	2064.57	1950.5	2119.83	2044.97
		B3	1885.89	1986.52	1941.35	1937.92
		B4	6491.14	7645.37	5894.7	6677.07
		B5	6035.83	5949.7	5109.73	5698.42
		B6	3771.67	3611.45	4094.02	3825.71
		B7	6151.03	7046.07	6038.51	6411.87
		B8	2322.99	2103.17	2213.08	2213.08
		B9	1635.71	1601.92	1543.97	1593.87
		B10	2117.86	1916.2	1830.39	1954.82
